# Supplementary material for: Prevalence of the Acute Respiratory Infections and Associated Factors in the Rural Areas and Urban Slum Areas of Western Maharashtra, India: A Community-Based Cross-Sectional Study
Source: Frontiers journal article supplement (doi:10.3389/fpubh.2021.723807), 2021-10-26
Supplement: Data_Sheet_1.PDF [file Data_Sheet_1.PDF]

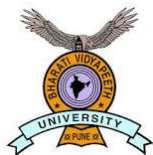

## Department of Community Medicine, BVDUMC, Pune

### BASELINE FORM\*

\* To be filled from all households from the selected clusters.

|                                                     |                                                               |    |                                              |    |                 |                    |              |       |  |
|-----------------------------------------------------|---------------------------------------------------------------|----|----------------------------------------------|----|-----------------|--------------------|--------------|-------|--|
| Household code (7 Digits)                           |                                                               |    |                                              |    |                 |                    |              |       |  |
| Date of interview                                   |                                                               | DD | /                                            | MM | /               | YYYY               |              |       |  |
| Name of Interviewer                                 | <i>Last Name</i>                                              |    | <i>First Name</i>                            |    |                 | <i>Middle Name</i> |              |       |  |
| Name of Respondent                                  | <i>Last Name</i>                                              |    | <i>First Name</i>                            |    |                 | <i>Middle Name</i> |              |       |  |
| Name of Family Head                                 | <i>Last Name</i>                                              |    | <i>First Name</i>                            |    |                 | <i>Middle Name</i> |              |       |  |
| ❖ INSTRUCTIONS: CIRCLE THE CORRECT RESPONSE.        |                                                               |    |                                              |    |                 |                    |              |       |  |
| Education of Family Head                            | 1. Illiterate                                                 |    | 2. Can read & write (but not went to school) |    |                 |                    |              |       |  |
|                                                     | 3. 1-3 pass                                                   |    | 4. 4-6 pass                                  |    | 5. 7-9 pass     |                    | 6. SSC       |       |  |
|                                                     | 7. HSC                                                        |    | 8. Diploma                                   |    | 9. Graduate     |                    | 10. PG/ PhD  |       |  |
| Address with Landmark                               |                                                               |    |                                              |    |                 |                    |              |       |  |
| Land Line No.                                       |                                                               |    | Mobile No.                                   |    |                 |                    |              |       |  |
| 1.                                                  | For how long you are staying here?                            |    | _____ years                                  |    |                 |                    |              |       |  |
| 2.                                                  | Type of Family                                                |    | 1. Joint                                     |    | 2. Nuclear      |                    | 3. Other     |       |  |
| 3.                                                  | Which colored ration card do you have?                        |    | 1. White                                     |    | 2. Orange       |                    | 3. Yellow    |       |  |
|                                                     |                                                               |    | 4. No Card                                   |    |                 |                    |              |       |  |
| 4.                                                  | Religion                                                      |    | 1. Hindu                                     |    | 2. Muslim       |                    | 3. Christian |       |  |
|                                                     |                                                               |    | 4. Buddhist                                  |    | 5. Sindhi       |                    | 6. Sikh      |       |  |
|                                                     |                                                               |    | 7. Parsi                                     |    | 8. Others _____ |                    |              |       |  |
| 5.                                                  | Caste                                                         |    | 1. SC                                        |    | 2. ST           |                    | 3. NT/VJNT   |       |  |
|                                                     |                                                               |    | 4. OBC                                       |    | 5. Open         |                    | 6. Others    |       |  |
|                                                     |                                                               |    | _____                                        |    |                 |                    |              |       |  |
| 6.                                                  | Total family members in the house                             |    |                                              |    |                 |                    |              |       |  |
| 7.                                                  | Are there children under the age of five years in the family? |    |                                              |    |                 | 1. Yes             |              | 2. No |  |
| ❖ If answer to Q. No. 7 is 'No' then go to Q. No. 9 |                                                               |    |                                              |    |                 |                    |              |       |  |

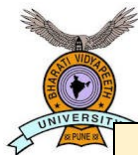

## BASELINE FORM\*

|                                                                                                                     |                                                                                                                 |                                                                                                                                              |                                                                       |               |               |               |   |
|---------------------------------------------------------------------------------------------------------------------|-----------------------------------------------------------------------------------------------------------------|----------------------------------------------------------------------------------------------------------------------------------------------|-----------------------------------------------------------------------|---------------|---------------|---------------|---|
| 8.                                                                                                                  | If yes, write details                                                                                           | 1                                                                                                                                            | Name                                                                  | Date of Birth | Age (yrs&mnt) |               |   |
|                                                                                                                     |                                                                                                                 | 2                                                                                                                                            |                                                                       | DD/MM/YYYY    | _____         |               |   |
|                                                                                                                     |                                                                                                                 | 3                                                                                                                                            |                                                                       | DD/MM/YYYY    | _____         |               |   |
|                                                                                                                     |                                                                                                                 | 4                                                                                                                                            |                                                                       | DD/MM/YYYY    | _____         |               |   |
|                                                                                                                     |                                                                                                                 | 5                                                                                                                                            |                                                                       | DD/MM/YYYY    | _____         |               |   |
|                                                                                                                     |                                                                                                                 | 6                                                                                                                                            |                                                                       | DD/MM/YYYY    | _____         |               |   |
|                                                                                                                     |                                                                                                                 | 9.                                                                                                                                           | How many married women in age group of 15 – 45 yrs. are in the house? | 0             | 1             | 2             | 3 |
| 10.                                                                                                                 | How many pregnant women are there in the house?                                                                 | 0                                                                                                                                            | 1                                                                     | 2             | 3             | 4             | 5 |
| <b>If answer to Q. No. 10 is 'zero' then go to Q. No. 12</b>                                                        |                                                                                                                 |                                                                                                                                              |                                                                       |               |               |               |   |
| 11.                                                                                                                 | If pregnant mother is in the house/family write months of gestation                                             | 1 <sup>st</sup> pregnant woman _____ months.<br>2 <sup>nd</sup> pregnant woman _____ months.<br>3 <sup>rd</sup> pregnant woman _____ months. |                                                                       |               |               |               |   |
| 12.                                                                                                                 | How many children under five years of age died in the last year (15/02/2015 to 14/02/2016) in your house/family | 0                                                                                                                                            | 1                                                                     | 2             | 3             |               |   |
| <i>❖ If Answer to Q. No. 12 is "zero", or there is death then inform Sub-investigator and Then go to Q. No. 17.</i> |                                                                                                                 |                                                                                                                                              |                                                                       |               |               |               |   |
| 13.                                                                                                                 | Is death certificate available? (Interviewer to look for the death certificate)                                 | 1 <sup>st</sup> death                                                                                                                        | 1. Yes                                                                | 2.No          |               |               |   |
|                                                                                                                     |                                                                                                                 | 2 <sup>nd</sup> death                                                                                                                        | 1. Yes                                                                | 2.No          |               |               |   |
|                                                                                                                     |                                                                                                                 | 3 <sup>rd</sup> death                                                                                                                        | 1. Yes                                                                | 2.No          |               |               |   |
| <i>❖ If Answer to Q. No. 13 is "No", Then go to Q. No. 15.</i>                                                      |                                                                                                                 |                                                                                                                                              |                                                                       |               |               |               |   |
| 14.                                                                                                                 | Write cause of death from the death certificate.                                                                | Cause of death                                                                                                                               |                                                                       |               |               |               |   |
|                                                                                                                     |                                                                                                                 | 1 <sup>st</sup> death                                                                                                                        |                                                                       |               |               |               |   |
|                                                                                                                     |                                                                                                                 | 2 <sup>nd</sup> death                                                                                                                        |                                                                       |               |               |               |   |
|                                                                                                                     |                                                                                                                 | 3 <sup>rd</sup> death                                                                                                                        |                                                                       |               |               |               |   |
| 15.                                                                                                                 | Write the symptoms present child before death                                                                   | Symptoms                                                                                                                                     |                                                                       |               |               | How many days |   |
|                                                                                                                     |                                                                                                                 | 1 <sup>st</sup> death                                                                                                                        |                                                                       |               |               |               |   |



## BASELINE FORM\*

|                                                               |                                                                                                                               |                                                      |                                               |             |                                                |
|---------------------------------------------------------------|-------------------------------------------------------------------------------------------------------------------------------|------------------------------------------------------|-----------------------------------------------|-------------|------------------------------------------------|
|                                                               |                                                                                                                               | 2 <sup>nd</sup> death                                |                                               |             |                                                |
|                                                               |                                                                                                                               | 3 <sup>rd</sup> death                                |                                               |             |                                                |
| 16.                                                           | Was the death due to respiratory disease? (where available cause of death to be confirmed from death certificate or symptoms) | 1 <sup>st</sup> death                                | 1. Yes                                        | 2.No        |                                                |
|                                                               |                                                                                                                               | 2 <sup>nd</sup> death                                | 1. Yes                                        | 2.No        |                                                |
|                                                               |                                                                                                                               | 3 <sup>rd</sup> death                                | 1. Yes                                        | 2.No        |                                                |
| <b>Housing and Environment History</b>                        |                                                                                                                               |                                                      |                                               |             |                                                |
| 17.                                                           | Total area of house in square feet                                                                                            | _____sqft. (carpet area)                             |                                               |             |                                                |
| 18.                                                           | Per capita square feet area (Conclusion from Q. No. 17 & 6)                                                                   |                                                      |                                               |             |                                                |
| 19.                                                           | Overcrowding (Conclusion)                                                                                                     |                                                      |                                               |             |                                                |
| 20.                                                           | No. of rooms in house                                                                                                         | 0                                                    | 1                                             | 2           |                                                |
|                                                               |                                                                                                                               | 3                                                    | 4                                             | 5           |                                                |
| 21.                                                           | Flooring of house                                                                                                             | 1. Tiled                                             | 2. Earthen (covered/ not covered by cow dung) |             |                                                |
|                                                               |                                                                                                                               |                                                      | 3. Cementing (koba)                           |             |                                                |
| 22.                                                           | Ceiling /table fan present in house                                                                                           | 0                                                    | 1                                             | 2           |                                                |
|                                                               |                                                                                                                               | 3                                                    | 4                                             | 5           |                                                |
| 23.                                                           | Exhaust fan                                                                                                                   | 1. Present                                           |                                               | 2. Absent   |                                                |
| 24.                                                           | Inference: Ventilation                                                                                                        |                                                      |                                               |             |                                                |
| 25.                                                           | Type of fuel used inside the house                                                                                            | 1. LPG    2. Biomass fuel (cow dung cake/ wood etc.) |                                               |             |                                                |
|                                                               |                                                                                                                               | 3. Stove with kerosene    4. Electric shegdi         |                                               |             |                                                |
|                                                               |                                                                                                                               | 5. Shegdi with coil                                  |                                               |             |                                                |
| If answer to Q. No. 25 is other than “2” then go to Q. No. 27 |                                                                                                                               |                                                      |                                               |             |                                                |
| 26.                                                           | If using biomass fuel; does the family uses smokeless chullah                                                                 | 1. Yes                                               |                                               | 2. No       |                                                |
| 27.                                                           | Does anybody smoke in the house                                                                                               | 1. Yes                                               |                                               | 2. No       |                                                |
| ❖ If Answer to Q. No. 27 is “No”, Then go to Q. No. 29.       |                                                                                                                               |                                                      |                                               |             |                                                |
| 28.                                                           | Name of the person who smokes                                                                                                 | Relation with child #                                | Type (1.Bidi/2.Cigarette)                     | Number/ day | Does smoke when inside the home (1.Yes / 2.No) |
|                                                               | 1.                                                                                                                            |                                                      |                                               |             |                                                |
|                                                               | 2.                                                                                                                            |                                                      |                                               |             |                                                |
|                                                               | 3.                                                                                                                            |                                                      |                                               |             |                                                |

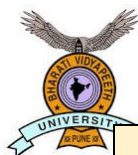

## BASELINE FORM\*

|    |                                                                                                       |                                                                                              |
|----|-------------------------------------------------------------------------------------------------------|----------------------------------------------------------------------------------------------|
|    | # 1-Father, 2-Mother, 3-Brother, 4-Sister, 5-GrandFather, 6-GrandMother, 7-Uncle, 8-Aunty, 9- Others. |                                                                                              |
| 29 | Is tobacco is burned at your house for preparation of <i>Mishri</i> ?                                 | 0. No    1. Daily    2. Alternate day<br>3. Twice a week    4. Once a week<br>5. Other _____ |

## FAMILY INFORMATION

| 30                                                                                                                                                                                                                                             | Information about family members (married daughters staying at some other place should not be included in the list) |     |                                 |                        |                         |                     |
|------------------------------------------------------------------------------------------------------------------------------------------------------------------------------------------------------------------------------------------------|---------------------------------------------------------------------------------------------------------------------|-----|---------------------------------|------------------------|-------------------------|---------------------|
| Sr. No.                                                                                                                                                                                                                                        | Complete Name                                                                                                       | Age | Gender<br>1. Male/<br>2. Female | Education <sup>§</sup> | Occupation <sup>#</sup> | Annual Income (Rs.) |
| 1                                                                                                                                                                                                                                              |                                                                                                                     |     |                                 |                        |                         |                     |
| 2                                                                                                                                                                                                                                              |                                                                                                                     |     |                                 |                        |                         |                     |
| 3                                                                                                                                                                                                                                              |                                                                                                                     |     |                                 |                        |                         |                     |
| 4                                                                                                                                                                                                                                              |                                                                                                                     |     |                                 |                        |                         |                     |
| 5                                                                                                                                                                                                                                              |                                                                                                                     |     |                                 |                        |                         |                     |
| 6                                                                                                                                                                                                                                              |                                                                                                                     |     |                                 |                        |                         |                     |
| 7                                                                                                                                                                                                                                              |                                                                                                                     |     |                                 |                        |                         |                     |
| 8                                                                                                                                                                                                                                              |                                                                                                                     |     |                                 |                        |                         |                     |
| 9                                                                                                                                                                                                                                              |                                                                                                                     |     |                                 |                        |                         |                     |
| 10                                                                                                                                                                                                                                             |                                                                                                                     |     |                                 |                        |                         |                     |
| 31.                                                                                                                                                                                                                                            | Total Annual family income                                                                                          |     |                                 |                        |                         |                     |
| 32.                                                                                                                                                                                                                                            | Per capita monthly income                                                                                           |     |                                 |                        |                         |                     |
| <sup>§</sup> 0. Age < 7 years (Not applicable)    1. Illiterate    2. Can read & write (but not went to school)    3. 1-3 pass<br>4. 4-6 pass    5. 7-9 pass    6. SSC    7. HSC    8. Diploma    9. Graduate    10. PG/ PhD                   |                                                                                                                     |     |                                 |                        |                         |                     |
| <sup>#</sup> 0. Age < 14 years (Not applicable)    1. Profession;    2. Semi-Profession;    3. Service;    4. Skilled Worker;    5. Semi-Skilled Worker;    6. Unskilled worker;    7. Homemaker    8. Unemployed    9. Retired    10. Student |                                                                                                                     |     |                                 |                        |                         |                     |

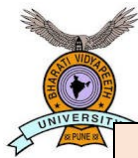

## FORM FOR CHILD UNDER 5 YEARS (0 to 4 years 364 days)

|                                                         |                                                                                        |                          |        |                          |  |  |  |  |
|---------------------------------------------------------|----------------------------------------------------------------------------------------|--------------------------|--------|--------------------------|--|--|--|--|
| Household code (7 digit)                                |                                                                                        | <input type="text"/>     |        |                          |  |  |  |  |
| Mother code (8 <sup>th</sup> digit)                     |                                                                                        | <input type="text"/>     |        |                          |  |  |  |  |
| Child Code (9 <sup>th</sup> digit)                      |                                                                                        | <input type="text"/>     |        |                          |  |  |  |  |
| Child Name                                              |                                                                                        | <input type="text"/>     |        |                          |  |  |  |  |
| 1.                                                      | Birth registered? (Ask for the birth certificate)                                      | 1. Yes                   |        | 2. No                    |  |  |  |  |
| 2.                                                      | Height of child                                                                        | <input type="text"/> cms | Weight | <input type="text"/> kgs |  |  |  |  |
| 3.                                                      | Mothers Name                                                                           | <input type="text"/>     |        |                          |  |  |  |  |
| 4.                                                      | Is the child registered in Anganwadi?                                                  | 1. Yes                   |        | 2. No                    |  |  |  |  |
| ❖ If Answer to Q. No. 4 is "Yes", then go to Q. No. 6.  |                                                                                        |                          |        |                          |  |  |  |  |
| 5.                                                      | If not Why?                                                                            | <input type="text"/>     |        |                          |  |  |  |  |
| 6.                                                      | Does child go to Anganwadi regularly? (> 20 days/month)                                | 1. Yes                   |        | 2. No                    |  |  |  |  |
| ❖ If Answer to Q. No. 6 is "Yes", then go to Q. No. 8.  |                                                                                        |                          |        |                          |  |  |  |  |
| 7.                                                      | If no Why?                                                                             | <input type="text"/>     |        |                          |  |  |  |  |
| 8.                                                      | Has child suffered from ARI (cough/cold) in last one month from the date of interview? | 1. Yes                   |        | 2. No                    |  |  |  |  |
| 9.                                                      | If Yes how many times                                                                  | 1                        | 2      | 3                        |  |  |  |  |
| 10.                                                     | If child had cough/cold was he/she given home remedies                                 | 1. Yes                   |        | 2. No                    |  |  |  |  |
| ❖ If answer to Q. No. 10 is no, then go to Q. No. 12    |                                                                                        |                          |        |                          |  |  |  |  |
| 11.                                                     | Which home remedies were given?                                                        | <input type="text"/>     |        |                          |  |  |  |  |
| 12.                                                     | Was your child admitted in hospital for any major illness in the past?                 | 1. Yes                   |        | 2. No                    |  |  |  |  |
| ❖ If Answer to Q. No. 12 is "No", then go to Q. No. 14. |                                                                                        |                          |        |                          |  |  |  |  |
| 13.                                                     | If yes, which disease?                                                                 | <input type="text"/>     |        |                          |  |  |  |  |
| 14.                                                     | Is the child suffering from any illness currently?                                     | 1. Yes                   |        | 2. No                    |  |  |  |  |
| ❖ If Answer to Q. No. 14 is "No", then go to Q. No. 16. |                                                                                        |                          |        |                          |  |  |  |  |

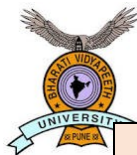

## FORM FOR CHILD UNDER 5 YEARS (0 to 4 years 364 days)

|                                                                                                                              |                                                                        |                                                                                                        |            |         |   |
|------------------------------------------------------------------------------------------------------------------------------|------------------------------------------------------------------------|--------------------------------------------------------------------------------------------------------|------------|---------|---|
| 15.                                                                                                                          | If yes, which illness?                                                 |                                                                                                        |            |         |   |
| 16.                                                                                                                          | How many times did the child suffered from pneumonia in last one year? | 0                                                                                                      | 1          | 2       | 3 |
|                                                                                                                              |                                                                        | If response to Q. 16 is zero, ask and circle to Yes for the signs and symptoms during any ARI episode. |            |         |   |
| 17.                                                                                                                          | a.                                                                     | <b>Cough</b>                                                                                           | 1. Yes     | 2. No   |   |
|                                                                                                                              | b.                                                                     | <b>Fever Present</b>                                                                                   | 1. Yes     | 2. No   |   |
|                                                                                                                              | c.                                                                     | <b>Flaring of nostrils</b>                                                                             | 1. Yes     | 2. No   |   |
|                                                                                                                              | d.                                                                     | <b>Fast breathing</b>                                                                                  | 1. Yes     | 2. No   |   |
|                                                                                                                              | e.                                                                     | <b>In-drawing of the chest</b>                                                                         | 1. Yes     | 2. No   |   |
|                                                                                                                              | f.                                                                     | Noisy breathing                                                                                        | 1. Yes     | 2. No   |   |
|                                                                                                                              | g.                                                                     | Wheezing sound                                                                                         | 1. Yes     | 2. No   |   |
|                                                                                                                              | h.                                                                     | Cyanosis                                                                                               | 1. Yes     | 2. No   |   |
|                                                                                                                              | i.                                                                     | Was child unconscious during the episode                                                               | 1. Yes     | 2. No   |   |
|                                                                                                                              | j.                                                                     | Were there any sluggish movements of the child during the episode                                      | 1. Yes     | 2. No   |   |
| <b>CONCLUSION FOR PNEUMONIA</b>                                                                                              |                                                                        |                                                                                                        | 1. Yes     | 2. No   |   |
| If answer to any one Q. No. 17 a to c is 'Yes' and answer to any one Q. No. 17 d to e is 'Yes' then conclusion is pneumonia. |                                                                        |                                                                                                        |            |         |   |
| <b>DETAILS OF PNEUMONIA</b>                                                                                                  |                                                                        |                                                                                                        |            |         |   |
| <i>Ask following details if child has suffered from pneumonia in last one year or conclusion is "Yes"</i>                    |                                                                        |                                                                                                        |            |         |   |
| <b>PNEUMONIA EPISODE – 1</b>                                                                                                 |                                                                        |                                                                                                        |            |         |   |
| 18.                                                                                                                          | 1. Who told that the child had pneumonia?                              | 1. Doctor                                                                                              | 2. Nurse   | 3. ASHA |   |
|                                                                                                                              |                                                                        | 4. Anganwadi Sevika                                                                                    | 5. Others  |         |   |
|                                                                                                                              |                                                                        | _____ 6. Interviewer's opinion                                                                         |            |         |   |
|                                                                                                                              | 2. Place of treatment                                                  | 1. Govt. Facility                                                                                      | 2. Private |         |   |
|                                                                                                                              |                                                                        | 3. Others _____                                                                                        |            |         |   |
|                                                                                                                              | 3. Whether the child was admitted in hospital?                         | 1. Yes                                                                                                 | 2. No      |         |   |
|                                                                                                                              | 4. if yes duration                                                     | _____ days                                                                                             |            |         |   |
|                                                                                                                              | 5. Duration of treatment                                               | _____ days                                                                                             |            |         |   |
|                                                                                                                              | 6. Total expenditure of treatment                                      | Rs. _____                                                                                              |            |         |   |
| Verify the above information based on records                                                                                |                                                                        |                                                                                                        |            |         |   |

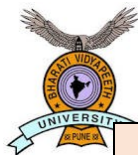

## FORM FOR CHILD UNDER 5 YEARS (0 to 4 years 364 days)

|                                                   |                                                                                                       |                                        |                                                                                               |
|---------------------------------------------------|-------------------------------------------------------------------------------------------------------|----------------------------------------|-----------------------------------------------------------------------------------------------|
|                                                   | 7. Verified?                                                                                          | 1. Yes                                 | 2. No                                                                                         |
| <b>PNEUMONIA EPISODE – 2</b>                      |                                                                                                       |                                        |                                                                                               |
| 19.                                               | 1. Who told that the child had pneumonia?                                                             | 1. Doctor                              | 2. Nurse      3. ASHA<br>4. Anganwadi Sevika      5. Others<br>_____ 6. Interviewer's opinion |
|                                                   | 2. Place of treatment                                                                                 | 1. Govt. Facility                      | 2. Private<br>3. Others _____                                                                 |
|                                                   | 3. Whether the child was admitted in hospital?                                                        | 1. Yes                                 | 2. No                                                                                         |
|                                                   | 4. if yes duration                                                                                    | _____ days                             |                                                                                               |
|                                                   | 5. Duration of treatment                                                                              | _____ days                             |                                                                                               |
|                                                   | 6. Total expenditure of treatment                                                                     | Rs. _____                              |                                                                                               |
| Verify the above information based on records     |                                                                                                       |                                        |                                                                                               |
|                                                   | 7. Verified?                                                                                          | 1. Yes                                 | 2. No                                                                                         |
| <b>Ask following questions about last episode</b> |                                                                                                       |                                        |                                                                                               |
| 20.                                               | Which transport facility you had used to visit to a doctor/facility?                                  |                                        |                                                                                               |
|                                                   | 1. Two wheeler                                                                                        | 2. Rickshaw                            |                                                                                               |
|                                                   | 3. Tempo                                                                                              | 4. Bus                                 |                                                                                               |
|                                                   | 5. Private vehicle                                                                                    | 6. Government Ambulance including 108  |                                                                                               |
|                                                   | 7. Private Ambulance                                                                                  | 8. Walking                             |                                                                                               |
|                                                   | 9. Other                                                                                              |                                        |                                                                                               |
| 21.                                               | How much distance you have to travel to take treatment for Pneumonia? And How much time it took?      |                                        |                                                                                               |
|                                                   | 1. Kms                                                                                                |                                        | 2. Time      _____ hours _____ min                                                            |
| 22.                                               | Did you have to borrow/sale/mortgage of assets for the treatment of the Child?                        | 1. Yes      2. No                      |                                                                                               |
| 23.                                               | Was there any loss of work due to child's pneumonia? (write '0' if no days)                           | Father _____ days<br>Mother _____ days |                                                                                               |
| 24.                                               | Which practices you followed at home when child was having Pneumonia (including home remedies if any) |                                        |                                                                                               |

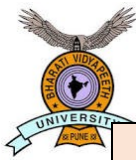

## FORM FOR CHILD UNDER 5 YEARS (0 to 4 years 364 days)

|     |                                                                         |        |       |
|-----|-------------------------------------------------------------------------|--------|-------|
| 25. | Had you informed ASHA/AWW/<br>Health worker about Pneumonia<br>episode? | 1. Yes | 2. No |
| 26. | Did ASHA/AWW help you during<br>treatment of child?                     | 1. Yes | 2. No |



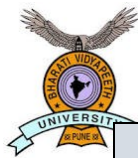

## ADDITIONAL INFORMATION FORM FOR INFANTS (0-1 year)

|                                                         |                                                               |                                                                                                                                                                                                                |
|---------------------------------------------------------|---------------------------------------------------------------|----------------------------------------------------------------------------------------------------------------------------------------------------------------------------------------------------------------|
| Mother code (8 <sup>th</sup> digit)                     |                                                               | <input type="text"/>                                        |
| Child Code (9 <sup>th</sup> digit)                      |                                                               | <input type="text"/>                   |
| Child Name                                              |                                                               |                                                                                                                                                                                                                |
| 1.                                                      | Place of birth                                                | 1. Gov. Hospital      2. Pvt. Hospital<br>3. Home                4. While going to Hospital<br>5. Other _____                                                                                                  |
| 2.                                                      | Type of delivery                                              | 1. Cesarean            2. Normal                                                                                                                                                                               |
| 3.                                                      | Weight at the time of Birth                                   | 1. _____ kg (from mother statement)<br>2. _____ kg (from records)                                                                                                                                              |
| 4.                                                      | If place of delivery is home, then who conducted the delivery | 1. Doctor      2. Nurse      3. Trained Dai<br>4. Untrained Dai<br>5. Other _____                                                                                                                              |
| 5.                                                      | Birth order of this child                                     | 1      2      3      4      5                                                                                                                                                                                  |
| 6.                                                      | Did the baby cry immediately after birth?                     | 1. Yes                2. No                                                                                                                                                                                    |
| 7.                                                      | Did you feed colostrum to the baby?                           | 1. Yes                2. No                                                                                                                                                                                    |
| ❖ If Answer to Q. No. 7 is "Yes", then go to Q. No. 9.  |                                                               |                                                                                                                                                                                                                |
| 8.                                                      | Why?                                                          |                                                                                                                                                                                                                |
| 9.                                                      | When did you start the breastfeeding after delivery?          | 0. Within half an hour    1. Within 1 hour<br>2. Within 2 hours        3. Within 4 hours<br>4. Within 24 hours      5. On 2nd days<br>6. On 3rd day            7. After 3 days<br>8. No breast feeding at all. |
| ❖ If Answer to Q. No. 9 is "Yes", then go to Q. No. 10. |                                                               |                                                                                                                                                                                                                |
| 10.                                                     | If option 8 is selected ask WHY?                              |                                                                                                                                                                                                                |
| 11.                                                     | What was the first feed to the baby                           | 1. Breast milk (colostrum)    2. Honey    3.                                                                                                                                                                   |

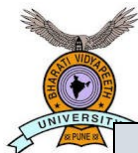

## ADDITIONAL INFORMATION FORM FOR INFANTS (0-1 year)

|     |                                                                        |                                                                    |
|-----|------------------------------------------------------------------------|--------------------------------------------------------------------|
|     |                                                                        | Sugar water 4. Guti<br>5. Other _____                              |
| 12. | For how many months did you give the child exclusive breast milk only? | 1. < 6 months 2. Up to 6 months<br>3. > 6 months 4. Not applicable |
| 13. | Weaning (solid food) was started at the age?                           | 1. _____ months 2. Not yet given 3. Not applicable                 |
| 14. | Are you still breastfeeding the child after weaning?                   | 1. Yes 2. No.<br>3. Weaning not yet started                        |
| 15. | At what age did you stop breastfeeding completely?                     | 1. Months _____<br>2. Not applicable since still breast feeding.   |

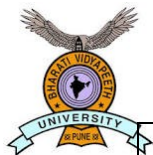

**IMMUNIZATION DETAILS (FOR AGE GROUP 12-23 MONTHS)**

| Mother's code:                                                                                            |                          | <input type="text"/>            |         |             |      | <input type="text"/> |  |
|-----------------------------------------------------------------------------------------------------------|--------------------------|---------------------------------|---------|-------------|------|----------------------|--|
| Child's name                                                                                              |                          | <input type="text"/>            |         |             |      |                      |  |
| Child's code:                                                                                             |                          | <input type="text"/>            |         |             |      | <input type="text"/> |  |
| <b>Confirm all details from immunization card. Don't include pulse polio doses. Write date from card.</b> |                          |                                 |         |             |      |                      |  |
| Sr. No.                                                                                                   | Age                      | Vaccine                         | 1.Given | 2.Not given | Date |                      |  |
| 1                                                                                                         | After birth              | BCG                             | 1       | 2           |      |                      |  |
|                                                                                                           |                          | OPV 0 (zero polio)              | 1       | 2           |      |                      |  |
|                                                                                                           |                          | HBV -0                          | 1       | 2           |      |                      |  |
| 2                                                                                                         | 6 weeks<br>(1.5 months)  | OPV-1                           | 1       | 2           |      |                      |  |
|                                                                                                           |                          | DPT-1                           | 1       | 2           |      |                      |  |
|                                                                                                           |                          | HBV-1                           | 1       | 2           |      |                      |  |
|                                                                                                           |                          | Pentavalent-1                   | 1       | 2           |      |                      |  |
|                                                                                                           |                          | Rotavirus -1                    | 1       | 2           |      |                      |  |
|                                                                                                           |                          | Pneumococcal -1                 | 1       | 2           |      |                      |  |
|                                                                                                           |                          | Hib – 1                         | 1       | 2           |      |                      |  |
|                                                                                                           |                          | IPV                             | 1       | 2           |      |                      |  |
| 3                                                                                                         | 10 weeks<br>(2.5 months) | OPV-2                           | 1       | 2           |      |                      |  |
|                                                                                                           |                          | DPT-2                           | 1       | 2           |      |                      |  |
|                                                                                                           |                          | HBV-2                           | 1       | 2           |      |                      |  |
|                                                                                                           |                          | Pentavalent-2                   | 1       | 2           |      |                      |  |
|                                                                                                           |                          | Rotavirus -2                    | 1       | 2           |      |                      |  |
|                                                                                                           |                          | Pneumococcal -2                 | 1       | 2           |      |                      |  |
|                                                                                                           |                          | Hib – 2                         | 1       | 2           |      |                      |  |
| 4                                                                                                         | 14 weeks<br>(3.5 months) | IPV                             | 1       | 2           |      |                      |  |
|                                                                                                           |                          | OPV-3                           | 1       | 2           |      |                      |  |
|                                                                                                           |                          | DPT-3                           | 1       | 2           |      |                      |  |
|                                                                                                           |                          | HBV-3                           | 1       | 2           |      |                      |  |
|                                                                                                           |                          | Pentavalent-3                   | 1       | 2           |      |                      |  |
|                                                                                                           |                          | Rotavirus -3                    | 1       | 2           |      |                      |  |
|                                                                                                           |                          | Pneumococcal -3                 | 1       | 2           |      |                      |  |
| 5                                                                                                         | 9 months                 | Hib – 3                         | 1       | 2           |      |                      |  |
|                                                                                                           |                          | IPV                             | 1       | 2           |      |                      |  |
| 6                                                                                                         | 16 months                | Measles-1                       | 1       | 2           |      |                      |  |
|                                                                                                           |                          | Vitamin A                       | 1       | 2           |      |                      |  |
| 7                                                                                                         | 16-24 months             | Vitamin A                       | 1       | 2           |      |                      |  |
|                                                                                                           |                          | DPT –booster                    | 1       | 2           |      |                      |  |
|                                                                                                           |                          | OPV- booster                    | 1       | 2           |      |                      |  |
|                                                                                                           |                          | Measles-2                       | 1       | 2           |      |                      |  |
|                                                                                                           |                          | MMR                             | 1       | 2           |      |                      |  |
|                                                                                                           |                          | Pneumococcal conjugate -booster | 1       | 2           |      |                      |  |
|                                                                                                           |                          | Hib booster                     | 1       | 2           |      |                      |  |
|                                                                                                           |                          | Chickenpox                      | 1       | 2           |      |                      |  |
| 8                                                                                                         | 24 months                | HAV                             | 1       | 2           |      |                      |  |
|                                                                                                           |                          | Vitamin A                       | 1       | 2           |      |                      |  |
| Whether child has received BCG, 3 doses of DPT, OPV, HBV and 1 dose of measles within one year of age     |                          |                                 | 1. Yes  | 2. No       |      |                      |  |



| <b>KAP of Mothers</b>                |                                                                                                                                                                                                                                                                                                                                                                                                                                                                          |  |  |  |  |  |  |  |  |
|--------------------------------------|--------------------------------------------------------------------------------------------------------------------------------------------------------------------------------------------------------------------------------------------------------------------------------------------------------------------------------------------------------------------------------------------------------------------------------------------------------------------------|--|--|--|--|--|--|--|--|
| Name of Mother                       |                                                                                                                                                                                                                                                                                                                                                                                                                                                                          |  |  |  |  |  |  |  |  |
| Mother Code ( 8 <sup>th</sup> digit) | <table border="1" style="display: inline-table; border-collapse: collapse;"> <tr> <td style="width: 20px; height: 20px;"></td> </tr> </table> |  |  |  |  |  |  |  |  |
|                                      |                                                                                                                                                                                                                                                                                                                                                                                                                                                                          |  |  |  |  |  |  |  |  |
| ❖ Circle the correct response        |                                                                                                                                                                                                                                                                                                                                                                                                                                                                          |  |  |  |  |  |  |  |  |
| 1.                                   | <div style="display: flex; justify-content: space-between;"> <div style="width: 45%;"> <p>Which are the common illnesses in under five children? (multiple response)</p> </div> <div style="width: 50%;"> <p>1. Fever      2. ARI      3. Pneumonia<br/>           4. Diarrhea    5. Measles    6. Malnutrition<br/>           7. Other _____</p> </div> </div>                                                                                                          |  |  |  |  |  |  |  |  |
| 2.                                   | Can ARI become a serious condition?      1. Yes      2. No                                                                                                                                                                                                                                                                                                                                                                                                               |  |  |  |  |  |  |  |  |
| 3.                                   | Can ARI be prevented?      1. Yes      2. No                                                                                                                                                                                                                                                                                                                                                                                                                             |  |  |  |  |  |  |  |  |
| 4.                                   | For how many months an infant should be given exclusive breast feeding?      _____ months                                                                                                                                                                                                                                                                                                                                                                                |  |  |  |  |  |  |  |  |
| 5.                                   | Measles vaccine is given at what age?      _____                                                                                                                                                                                                                                                                                                                                                                                                                         |  |  |  |  |  |  |  |  |
| 6.                                   | What are the effects of smoking of a family member on child's health?      _____                                                                                                                                                                                                                                                                                                                                                                                         |  |  |  |  |  |  |  |  |
| 7.                                   | Knowledge about hand hygiene                                                                                                                                                                                                                                                                                                                                                                                                                                             |  |  |  |  |  |  |  |  |
|                                      | <div style="display: flex; justify-content: space-between;"> <div style="width: 45%;"> <p>a. When to wash your (mother's) hands?</p> </div> <div style="width: 50%;"> <p>1. ....<br/>           2. ....<br/>           3. ....<br/>           4. ....</p> </div> </div>                                                                                                                                                                                                  |  |  |  |  |  |  |  |  |
|                                      | <div style="display: flex; justify-content: space-between;"> <div style="width: 45%;"> <p>b. What to use for washing hands?</p> </div> <div style="width: 50%;"> <p>1. Water only      2. Ash<br/>           3. Soil      4. Soap and water<br/>           5. Others .....</p> </div> </div>                                                                                                                                                                             |  |  |  |  |  |  |  |  |
| 8.                                   | Which are the risk factors from the list for pneumonia?(multiple response )                                                                                                                                                                                                                                                                                                                                                                                              |  |  |  |  |  |  |  |  |
|                                      | <div style="display: flex; justify-content: space-between;"> <div style="width: 45%;"> <p>1. Low birth weight</p> </div> <div style="width: 50%;"> <p>2. Prematurity</p> </div> </div>                                                                                                                                                                                                                                                                                   |  |  |  |  |  |  |  |  |
|                                      | <div style="display: flex; justify-content: space-between;"> <div style="width: 45%;"> <p>3. Hypertension of mother</p> </div> <div style="width: 50%;"> <p>4. Non-exclusive breast feeding for six months</p> </div> </div>                                                                                                                                                                                                                                             |  |  |  |  |  |  |  |  |
|                                      | <div style="display: flex; justify-content: space-between;"> <div style="width: 45%;"> <p>5. Nuclear Family</p> </div> <div style="width: 50%;"> <p>6. Smoking by family member in the house</p> </div> </div>                                                                                                                                                                                                                                                           |  |  |  |  |  |  |  |  |
|                                      | <div style="display: flex; justify-content: space-between;"> <div style="width: 45%;"> <p>7. Malnourishment of child</p> </div> <div style="width: 50%;"> <p>8. Baby born by LSCS</p> </div> </div>                                                                                                                                                                                                                                                                      |  |  |  |  |  |  |  |  |

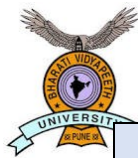

## KAP of Mothers

|     |                                                                                                                                         |                                       |
|-----|-----------------------------------------------------------------------------------------------------------------------------------------|---------------------------------------|
|     | 9. Poor hand hygiene in mother                                                                                                          | 10. Use of chulha or biomass in house |
|     | 11. age of mother < 20 years                                                                                                            | 12. Overcrowding in house             |
|     | 13. Others                                                                                                                              | 14. Don't Know                        |
| 9.  | What are the symptoms of pneumonia? (multiple response )                                                                                |                                       |
|     | 1. Fever                                                                                                                                | 2. Cold                               |
|     | 3. Cough                                                                                                                                | 4. Difficulty in breathing            |
|     | 5. Increased rate of breathing                                                                                                          | 6. Noisy breathing                    |
|     | 7. Flaring of nostrils                                                                                                                  | 8. Chest in drawing                   |
|     | 9. Other                                                                                                                                | 10. Don't know                        |
|     | If answer to Q. No. 9 is "Don't know" then go to Q. No. 11                                                                              |                                       |
| 10. | What are the danger signs of Pneumonia from above when you need to show the child to some doctor or health worker? (multiple response ) |                                       |
|     | 1. Fever                                                                                                                                | 2. Cold                               |
|     | 3. Cough                                                                                                                                | 4. Difficulty in breathing            |
|     | 5. Increased rate of breathing                                                                                                          | 6. Noisy breathing                    |
|     | 7. Flaring of nostrils                                                                                                                  | 8. Chest in drawing                   |
|     | 9. Other                                                                                                                                | 10. Don't know                        |
| 11. | Where will you go first to take treatment if your child gets illness like Pneumonia?                                                    | 1. Government 2. Private 3. Others    |
| 12. | What is/are the reason/s for the choice of the treatment Facility (multiple response)                                                   |                                       |
|     | 1. Closest Facility                                                                                                                     | 2. Good care offered                  |
|     | 3. Only facility Accessible                                                                                                             | 4. Financial Treatment Affordability  |
|     | 5. Short waiting time                                                                                                                   | 6. Personal relation to personnel     |
|     | 7. High trust in skill of personnel                                                                                                     | 8. Other                              |
| 13. | Can Pneumonia cause death?                                                                                                              | 1. Yes 2. No                          |
| 14. | Should government think of Pneumonia control activities?                                                                                | 1. Yes 2. No                          |
| 15. | Is mother's hygiene important?                                                                                                          | 1. Yes 2. No                          |

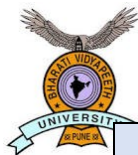

## KAP of Mothers

|                                                 |                                                                                                                          |  |
|-------------------------------------------------|--------------------------------------------------------------------------------------------------------------------------|--|
| 16. If yes, then specify                        |                                                                                                                          |  |
| 17. Practice about hand hygiene                 |                                                                                                                          |  |
| a. When do you wash hands?                      | 1. ....<br>2. ....<br>3. ....<br>4. ....                                                                                 |  |
| b. What material do you use to wash your hands? | 1. Water only                      2. Ash<br>3. Soil                                4. Soap and water<br>5. Others ..... |  |
